# Supplementary material
Source: PubMed Central journal article supplement (PMC10841831)
Supplement: NIHMS1933160-supplement-Supp1.pdf [file NIHMS1933160-supplement-Supp1.pdf]

**Supplemental table 1.** The average coefficients of variation and intra-class correlations among major tryptophan metabolites in three cohorts.

| <b>Plasma tryptophan metabolites</b> | <b>HPFS</b>    |                 | <b>NHS</b>     |                 | <b>NHSII</b>   |                 |
|--------------------------------------|----------------|-----------------|----------------|-----------------|----------------|-----------------|
|                                      | <b>Mean CV</b> | <b>Mean ICC</b> | <b>Mean CV</b> | <b>Mean ICC</b> | <b>Mean CV</b> | <b>Mean ICC</b> |
| <b>Tryptophan</b>                    | 9.4            | 0.79            | 9.8            | 0.78            | 9.8            | 0.78            |
| <b>IPA</b>                           | 28.3           | 0.98            | 41.0           | 0.94            | 15.4           | 1.00            |
| <b>IS</b>                            | 11.3           | 0.97            | 15.1           | 0.95            | 14.7           | 0.94            |
| <b>Serotonin</b>                     | -              | -               | 32.7           | 0.98            | 32.4           | 0.98            |
| <b>Kynurenine</b>                    | 9.9            | 0.85            | 14.7           | 0.88            | 23.0           | 0.84            |
| <b>Kynurenic acid</b>                | -              | -               | 25.3           | 0.75            | -              | -               |
| <b>Quinolinic acid</b>               | 20.7           | 0.76            | 21.0           | 0.90            | 20.2           | 0.93            |
| <b>Xanthurenic acid</b>              | 27.9           | 0.70            | 30.9           | 0.72            | 22.5           | 0.92            |

**Supplemental table 2.** Beta coefficients and p values of the 2-way interaction terms between total and individual species rank score and dietary tryptophan on plasma IPA concentrations.

| <b>Species rank score</b>           | <b>Beta coefficients</b> | <b>P</b> |
|-------------------------------------|--------------------------|----------|
| Total                               | 0.000564                 | 0.36614  |
| coprobacillus_unclassified          | 0.001661                 | 0.804105 |
| lactococcus_lactis                  | -0.00436                 | 0.334466 |
| clostridium_symbiosum               | 0.003245                 | 0.518947 |
| clostridium_clostridioforme         | 0.008579                 | 0.516225 |
| flavonifractor_plautii              | -0.00075                 | 0.852686 |
| clostridium_nexile                  | -0.02995                 | 0.104941 |
| ruminococcus_gnavus                 | 0.003207                 | 0.408465 |
| bacteroides_dorei                   | -0.00032                 | 0.90837  |
| eubacterium_eligens                 | 0.002177                 | 0.394987 |
| eubacterium_sp_3_1_31               | -0.01203                 | 0.177632 |
| clostridiales_bacterium_1_7_47faa   | 0.004688                 | 0.448636 |
| butyrivibrio_crossotus              | 0.007695                 | 0.740985 |
| lachnospiraceae_bacterium_2_1_58faa | 0.005346                 | 0.381801 |
| lachnospiraceae_bacterium_5_1_57faa | 0.05884                  | 0.005343 |
| lachnospiraceae_bacterium_1_4_56faa | -0.00593                 | 0.192924 |
| bacteroides_faecis                  | 0.006236                 | 0.302629 |
| faecalibacterium_prausnitzii        | 0.000582                 | 0.81658  |

**Supplemental table 3.** Beta coefficients and p values of the 3-way interaction terms among total species rank score, dietary tryptophan and tryptophan food contributors, and dietary fiber on plasma IPA concentrations

| Food contributors  | Beta        | P       | Beta          | P       | Beta            | P       | Beta     | P       |
|--------------------|-------------|---------|---------------|---------|-----------------|---------|----------|---------|
|                    | Total fiber |         | Soluble fiber |         | Insoluble fiber |         | Pectin   |         |
| Tryptophan         | 1.7E-04     | 7.8E-04 | 4.0E-04       | 3.4E-02 | 2.6E-04         | 1.2E-04 | 1.3E-03  | 8.2E-04 |
| Vegetables         | 2.0E-05     | 2.0E-03 | 9.0E-05       | 1.2E-03 | 3.0E-05         | 3.8E-03 | 9.0E-05  | 4.0E-02 |
| Legume             | 5.0E-05     | 3.4E-01 | 1.8E-04       | 3.9E-01 | 6.0E-05         | 3.8E-01 | 7.0E-05  | 8.1E-01 |
| Nuts               | 2.0E-05     | 3.5E-02 | 7.0E-05       | 2.8E-02 | 2.0E-05         | 5.7E-02 | 9.0E-05  | 1.0E-01 |
| Fruits             | 1.0E-05     | 1.3E-01 | 3.0E-05       | 1.7E-01 | 1.0E-05         | 1.4E-01 | 2.0E-05  | 5.1E-01 |
| Red/processed meat | -2.0E-05    | 1.1E-02 | -8.0E-05      | 1.3E-02 | -3.0E-05        | 2.0E-02 | -6.0E-05 | 2.9E-01 |
| Poultry            | 0.0E+00     | 9.5E-01 | 2.0E-05       | 6.7E-01 | 0.0E+00         | 9.3E-01 | 3.0E-05  | 7.7E-01 |
| Fish               | -1.0E-05    | 6.9E-01 | 2.0E-05       | 6.5E-01 | -1.0E-05        | 4.8E-01 | -2.0E-05 | 7.7E-01 |
| Egg                | -9.0E-05    | 1.7E-02 | -1.9E-04      | 9.9E-02 | -1.2E-04        | 1.4E-02 | -2.5E-04 | 1.7E-01 |
| Dairy              | 2.0E-05     | 1.3E-02 | 5.0E-05       | 8.3E-02 | 3.0E-05         | 6.8E-03 | 1.7E-04  | 1.5E-03 |
| Whole grain        | 2.0E-05     | 1.7E-03 | 5.0E-05       | 7.4E-03 | 3.0E-05         | 2.0E-03 | 1.4E-04  | 1.0E-04 |

**Supplemental table 4.** Associations between DNA pathways within IPA-associated species and plasma IPA concentrations

| IPA-associated species              | Beta     | Pathways                                          | Function groups          |
|-------------------------------------|----------|---------------------------------------------------|--------------------------|
| <b>faecalibacterium_prausnitzii</b> | 0.004283 | 4-deoxy-1-threo-hex-4-enopyranuronate degradation | Energy metabolism        |
| <b>butyrivibrio_crossotus</b>       | 0.002999 | 5-aminoimidazole ribonucleotide biosynthesis I    | Nucleotides biosynthesis |
| <b>faecalibacterium_prausnitzii</b> | 0.002981 | 5-aminoimidazole ribonucleotide biosynthesis I    | Nucleotides biosynthesis |
| <b>butyrivibrio_crossotus</b>       | 0.003094 | 5-aminoimidazole ribonucleotide biosynthesis II   | Nucleotides biosynthesis |
| <b>faecalibacterium_prausnitzii</b> | 0.003153 | 5-aminoimidazole ribonucleotide biosynthesis II   | Nucleotides biosynthesis |
| <b>bacteroides_faecis</b>           | -0.00174 | adenine and adenosine salvage III                 | Nucleotides biosynthesis |
| <b>faecalibacterium_prausnitzii</b> | 0.003778 | adenine and adenosine salvage III                 | Nucleotides biosynthesis |
| <b>bacteroides_faecis</b>           | -0.0021  | adenosine ribonucleotides de novo biosynthesis    | Nucleotides biosynthesis |
| <b>butyrivibrio_crossotus</b>       | 0.003363 | adenosine ribonucleotides de novo biosynthesis    | Nucleotides biosynthesis |
| <b>faecalibacterium_prausnitzii</b> | 0.004079 | adenosine ribonucleotides de novo biosynthesis    | Nucleotides biosynthesis |
| <b>ruminococcus_gnavus</b>          | -0.00236 | adenosine ribonucleotides de novo biosynthesis    | Nucleotides biosynthesis |
| <b>faecalibacterium_prausnitzii</b> | 0.003749 | adenosylcobalamin salvage from cobinamide I       | Energy metabolism        |
| <b>faecalibacterium_prausnitzii</b> | 0.004483 | calvin-benson-bassham cycle                       | Energy metabolism        |
| <b>bacteroides_faecis</b>           | -0.00163 | cdp-diacylglycerol biosynthesis I                 | Energy metabolism        |
| <b>butyrivibrio_crossotus</b>       | 0.002647 | cdp-diacylglycerol biosynthesis I                 | Energy metabolism        |
| <b>faecalibacterium_prausnitzii</b> | 0.003877 | cdp-diacylglycerol biosynthesis I                 | Energy metabolism        |
| <b>bacteroides_faecis</b>           | -0.00163 | cdp-diacylglycerol biosynthesis II                | Energy metabolism        |
| <b>butyrivibrio_crossotus</b>       | 0.002647 | cdp-diacylglycerol biosynthesis II                | Energy metabolism        |
| <b>faecalibacterium_prausnitzii</b> | 0.003877 | cdp-diacylglycerol biosynthesis II                | Energy metabolism        |
| <b>butyrivibrio_crossotus</b>       | 0.002801 | chorismate biosynthesis from 3-dehydroquinate     | Amino acids biosynthesis |
| <b>butyrivibrio_crossotus</b>       | 0.002766 | chorismate biosynthesis I                         | Amino acids biosynthesis |
| <b>bacteroides_faecis</b>           | -0.00158 | cmp-3-deoxy-d-manno-octulosonate biosynthesis I   | Homeostasis              |
| <b>faecalibacterium_prausnitzii</b> | 0.003317 | coenzyme a biosynthesis I                         | Coenzyme biosynthesis    |
| <b>bacteroides_dorei</b>            | -0.00434 | coenzyme a biosynthesis II (mammalian)            | Coenzyme biosynthesis    |
| <b>bacteroides_faecis</b>           | -0.00161 | coenzyme a biosynthesis II (mammalian)            | Coenzyme biosynthesis    |
| <b>butyrivibrio_crossotus</b>       | 0.002631 | coenzyme a biosynthesis II (mammalian)            | Coenzyme biosynthesis    |
| <b>faecalibacterium_prausnitzii</b> | 0.00319  | coenzyme a biosynthesis II (mammalian)            | Coenzyme biosynthesis    |
| <b>faecalibacterium_prausnitzii</b> | 0.004435 | d-fructuronate degradation                        | Energy metabolism        |
| <b>faecalibacterium_prausnitzii</b> | 0.004129 | d-galactose degradation v (leloir pathway)        | Energy metabolism        |
| <b>faecalibacterium_prausnitzii</b> | 0.004061 | d-galacturonate degradation I                     | Energy metabolism        |
| <b>faecalibacterium_prausnitzii</b> | 0.004139 | dtdp-1-rhamnose biosynthesis I                    | Nucleotides biosynthesis |

|                                     |          |                                                                |                          |
|-------------------------------------|----------|----------------------------------------------------------------|--------------------------|
| <b>bacteroides_dorei</b>            | -0.00435 | folate transformations II                                      | Nucleotides biosynthesis |
| <b>bacteroides_faecis</b>           | -0.00162 | folate transformations II                                      | Nucleotides biosynthesis |
| <b>faecalibacterium_prausnitzii</b> | 0.004129 | galactose degradation I (leloir pathway)                       | Energy metabolism        |
| <b>faecalibacterium_prausnitzii</b> | 0.003715 | glutaryl-coa degradation                                       | Homeostasis              |
| <b>bacteroides_faecis</b>           | -0.00187 | glycolysis Iv (plant cytosol)                                  | Energy metabolism        |
| <b>faecalibacterium_prausnitzii</b> | 0.004423 | glycolysis Iv (plant cytosol)                                  | Energy metabolism        |
| <b>bacteroides_faecis</b>           | -0.00179 | gondoate biosynthesis (anaerobic)                              | Energy metabolism        |
| <b>bacteroides_faecis</b>           | -0.00178 | guanosine ribonucleotides de novo biosynthesis                 | Nucleotides biosynthesis |
| <b>butyrivibrio_crossotus</b>       | 0.002682 | guanosine ribonucleotides de novo biosynthesis                 | Nucleotides biosynthesis |
| <b>faecalibacterium_prausnitzii</b> | 0.003461 | guanosine ribonucleotides de novo biosynthesis                 | Nucleotides biosynthesis |
| <b>bacteroides_faecis</b>           | -0.00173 | Inosine-5'-phosphate biosynthesis I                            | Nucleotides biosynthesis |
| <b>faecalibacterium_prausnitzii</b> | 0.003585 | Inosine-5'-phosphate biosynthesis I                            | Nucleotides biosynthesis |
| <b>bacteroides_faecis</b>           | -0.00168 | Inosine-5'-phosphate biosynthesis II                           | Nucleotides biosynthesis |
| <b>faecalibacterium_prausnitzii</b> | 0.003552 | Inosine-5'-phosphate biosynthesis II                           | Nucleotides biosynthesis |
| <b>bacteroides_faecis</b>           | -0.00168 | l-histidine biosynthesis                                       | Amino acids biosynthesis |
| <b>faecalibacterium_prausnitzii</b> | 0.004582 | l-isoleucine biosynthesis I (from threonine)                   | Amino acids biosynthesis |
| <b>faecalibacterium_prausnitzii</b> | 0.004418 | l-isoleucine biosynthesis III                                  | Amino acids biosynthesis |
| <b>bacteroides_dorei</b>            | -0.00415 | l-lysine biosynthesis III                                      | Amino acids biosynthesis |
| <b>bacteroides_faecis</b>           | -0.00191 | l-lysine biosynthesis III                                      | Amino acids biosynthesis |
| <b>faecalibacterium_prausnitzii</b> | 0.00395  | l-lysine biosynthesis III                                      | Amino acids biosynthesis |
| <b>ruminococcus_gnavus</b>          | -0.0023  | l-lysine biosynthesis III                                      | Amino acids biosynthesis |
| <b>bacteroides_faecis</b>           | -0.00186 | l-lysine biosynthesis vi                                       | Amino acids biosynthesis |
| <b>faecalibacterium_prausnitzii</b> | 0.003531 | l-lysine biosynthesis vi                                       | Amino acids biosynthesis |
| <b>ruminococcus_gnavus</b>          | -0.00238 | l-lysine biosynthesis vi                                       | Amino acids biosynthesis |
| <b>bacteroides_faecis</b>           | -0.00185 | l-rhamnose degradation I                                       | Energy metabolism        |
| <b>butyrivibrio_crossotus</b>       | 0.00307  | l-valine biosynthesis                                          | Amino acids biosynthesis |
| <b>faecalibacterium_prausnitzii</b> | 0.004712 | l-valine biosynthesis                                          | Amino acids biosynthesis |
| <b>butyrivibrio_crossotus</b>       | 0.002974 | methylerythritol phosphate pathway I                           | Homeostasis              |
| <b>faecalibacterium_prausnitzii</b> | 0.002713 | pantothenate and coenzyme a biosynthesis III                   | Homeostasis              |
| <b>faecalibacterium_prausnitzii</b> | 0.003062 | pentose phosphate pathway (non-oxidative branch)               | Homeostasis              |
| <b>faecalibacterium_prausnitzii</b> | 0.003987 | peptidoglycan biosynthesis I (meso-diaminopimelate containing) | Homeostasis              |
| <b>faecalibacterium_prausnitzii</b> | 0.00393  | peptidoglycan biosynthesis III (mycobacteria)                  | Homeostasis              |
| <b>faecalibacterium_prausnitzii</b> | 0.00332  | peptidoglycan maturation (meso-diaminopimelate containing)     | Homeostasis              |

|                                     |          |                                                                                    |                          |
|-------------------------------------|----------|------------------------------------------------------------------------------------|--------------------------|
| <b>bacteroides_faecis</b>           | -0.00183 | phosphopantothenate biosynthesis I                                                 | Homeostasis              |
| <b>butyrivibrio_crossotus</b>       | 0.003287 | phosphopantothenate biosynthesis I                                                 | Homeostasis              |
| <b>butyrivibrio_crossotus</b>       | 0.002747 | preq0 biosynthesis                                                                 | Nucleotides biosynthesis |
| <b>butyrivibrio_crossotus</b>       | 0.00281  | purine ribonucleosides degradation                                                 | Nucleotides degradation  |
| <b>faecalibacterium_prausnitzii</b> | 0.003856 | purine ribonucleosides degradation                                                 | Nucleotides degradation  |
| <b>ruminococcus_gnavus</b>          | -0.00235 | purine ribonucleosides degradation                                                 | Nucleotides degradation  |
| <b>faecalibacterium_prausnitzii</b> | 0.003224 | putrescine biosynthesis Iv                                                         | Homeostasis              |
| <b>bacteroides_faecis</b>           | -0.00158 | pyridoxal 5'-phosphate biosynthesis I                                              | Amino acids biosynthesis |
| <b>butyrivibrio_crossotus</b>       | 0.003079 | pyruvate fermentation to Isobutanol (engineered)                                   | Energy metabolism        |
| <b>faecalibacterium_prausnitzii</b> | 0.004793 | pyruvate fermentation to Isobutanol (engineered)                                   | Energy metabolism        |
| <b>bacteroides_faecis</b>           | -0.00171 | queuosine biosynthesis                                                             | Nucleotides degradation  |
| <b>butyrivibrio_crossotus</b>       | 0.002822 | queuosine biosynthesis                                                             | Nucleotides degradation  |
| <b>butyrivibrio_crossotus</b>       | 0.002981 | s-adenosyl-l-methionine cycle I                                                    | Homeostasis              |
| <b>faecalibacterium_prausnitzii</b> | 0.004009 | s-adenosyl-l-methionine cycle I                                                    | Homeostasis              |
| <b>ruminococcus_gnavus</b>          | -0.00243 | s-adenosyl-l-methionine cycle I                                                    | Homeostasis              |
| <b>butyrivibrio_crossotus</b>       | 0.002849 | starch degradation v                                                               | Energy metabolism        |
| <b>faecalibacterium_prausnitzii</b> | 0.004153 | starch degradation v                                                               | Energy metabolism        |
| <b>ruminococcus_gnavus</b>          | -0.00246 | starch degradation v                                                               | Energy metabolism        |
| <b>faecalibacterium_prausnitzii</b> | 0.004096 | sucrose degradation III (sucrose Invertase)                                        | Energy metabolism        |
| <b>faecalibacterium_prausnitzii</b> | 0.003991 | thiamin formation from pyrithiamine and oxythiamine (yeast)                        | Energy metabolism        |
| <b>butyrivibrio_crossotus</b>       | 0.002869 | udp-n-acetylmuramoyl-pentapeptide biosynthesis I (meso-diaminopimelate containing) | Homeostasis              |
| <b>faecalibacterium_prausnitzii</b> | 0.003513 | udp-n-acetylmuramoyl-pentapeptide biosynthesis I (meso-diaminopimelate containing) | Homeostasis              |
| <b>butyrivibrio_crossotus</b>       | 0.002935 | udp-n-acetylmuramoyl-pentapeptide biosynthesis II (lysine-containing)              | Homeostasis              |
| <b>faecalibacterium_prausnitzii</b> | 0.003935 | udp-n-acetylmuramoyl-pentapeptide biosynthesis II (lysine-containing)              | Homeostasis              |
| <b>bacteroides_faecis</b>           | -0.00169 | ump biosynthesis                                                                   | Nucleotides biosynthesis |
| <b>butyrivibrio_crossotus</b>       | 0.002865 | ump biosynthesis                                                                   | Nucleotides biosynthesis |
| <b>faecalibacterium_prausnitzii</b> | 0.00405  | ump biosynthesis                                                                   | Nucleotides biosynthesis |
| <b>bacteroides_faecis</b>           | -0.00178 | urate biosynthesis/inosine 5'-phosphate degradation                                | Nucleotides degradation  |
| <b>faecalibacterium_prausnitzii</b> | 0.003952 | urate biosynthesis/inosine 5'-phosphate degradation                                | Nucleotides degradation  |

**Supplemental table 5.** Mediation analysis for IPA and kynurenine pathway (KP) metabolites in the association between dietary tryptophan intake and type 2 diabetes risk.

|                                              | Proportion of association explained (95% CI) * | P value |
|----------------------------------------------|------------------------------------------------|---------|
| <b>IPA</b>                                   | 12.2% (4.2%, 30.4%)                            | 0.003   |
| <b>Plasma tryptophan</b>                     | 1.2% (0.3%, 5.0%)                              | 0.08    |
| <b>All KP metabolites</b>                    | 8.2% (2.7%, 22.2%)                             | 0.01    |
| <b>KP metabolites without kynurenic acid</b> | 7.8% (2.6%, 21.0%)                             | 0.01    |
| <b>Individual KP metabolite</b>              |                                                |         |
| -Kynurenine                                  | <1%                                            | -       |
| -Kynurenic acid                              | 1.3% (0.2%, 9.8%)                              | 0.16    |
| -Quinolinic acid                             | 3.8% (0.7%, 19.1%)                             | 0.12    |
| -Xanthurenic acid                            | 5.9% (1.6%, 20.0%)                             | 0.04    |

Proportional hazard model adjusted for age, race, cohort origin, physical activity, alcohol intake, AHEI, smoking status, BMI, and total energy intake.

\*The mathematical transformation used in calculating the confidence interval of the mediation effects did not allow for non-positive value, and therefore the p values were used to determine statistical significance.

**Supplemental table 6.** Associations between fiber intake and kynurenine pathway metabolites

|                         | Total fiber |       | Soluble fiber |       | Insoluble fiber |       |
|-------------------------|-------------|-------|---------------|-------|-----------------|-------|
|                         | Beta        | P     | Beta          | P     | Beta            | P     |
| <b>Kynurenine</b>       | -0.004      | 0.225 | -0.018        | 0.086 | -0.004          | 0.236 |
| <b>Kynurenic acid</b>   | -0.005      | 0.033 | -0.023        | 0.004 | -0.005          | 0.069 |
| <b>Quinolinic acid</b>  | -0.005      | 0.147 | -0.014        | 0.162 | -0.007          | 0.044 |
| <b>Xanthurenic acid</b> | -0.002      | 0.476 | -0.004        | 0.722 | -0.006          | 0.113 |

Model adjusted for age, race, cohort origin, physical activity, alcohol intake, AHEI, smoking status, BMI, and total energy intake.

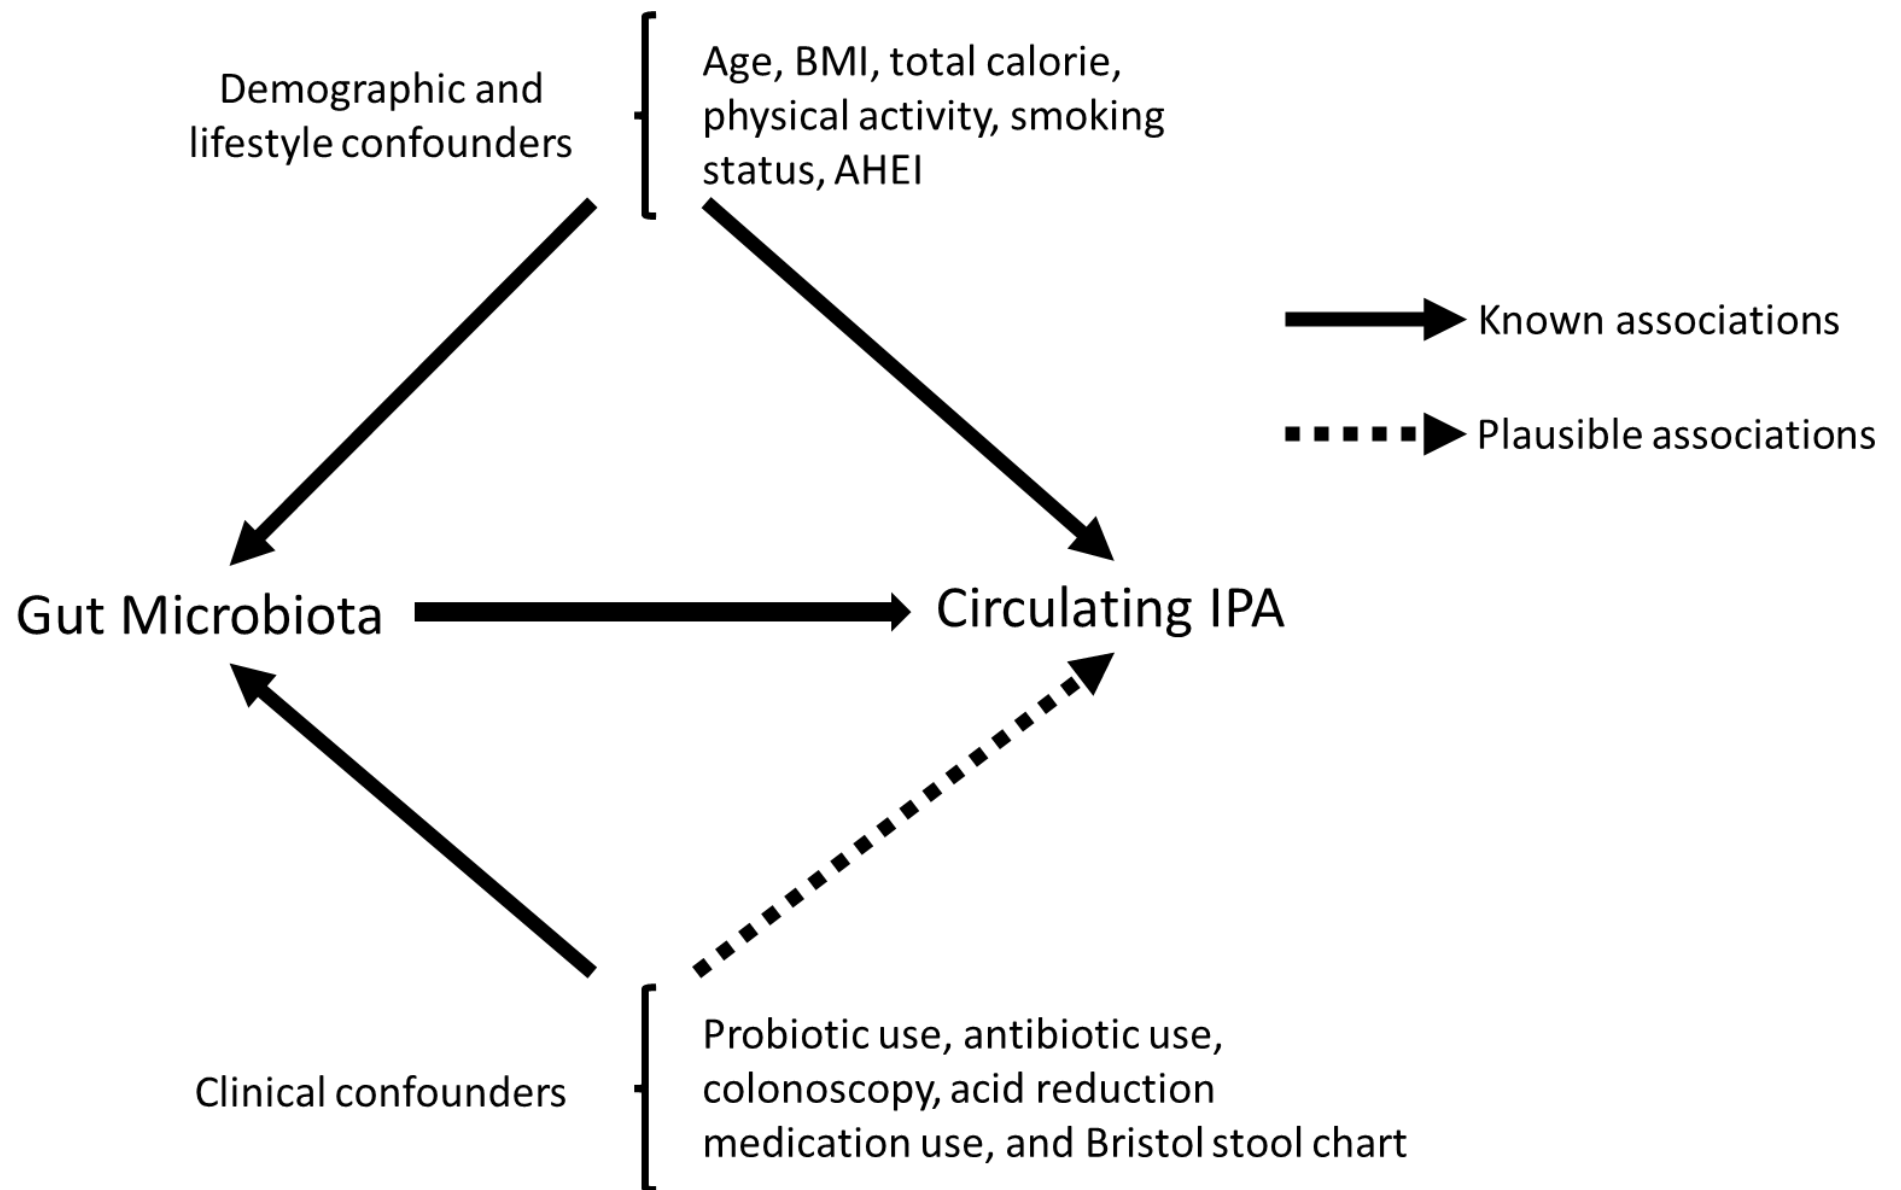

**Supplemental figure 1.** Conceptual framework of the associations between gut microbiome and circulating IPA level.



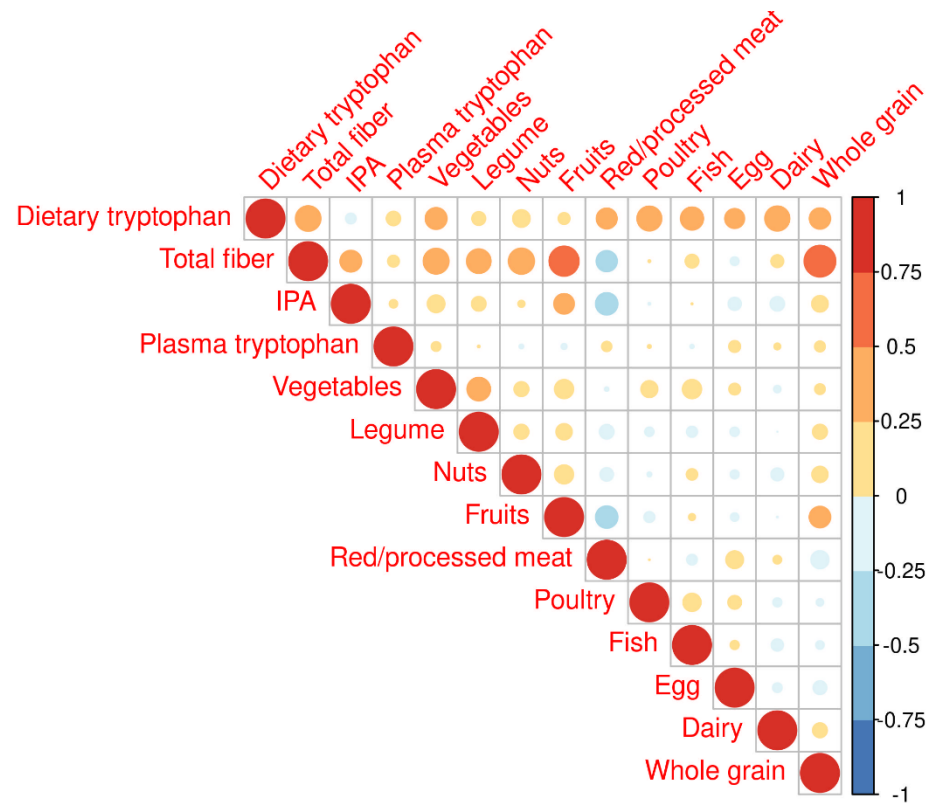

**Supplemental figure 2.** Pearson correlations among dietary tryptophan, fiber, and major tryptophan food contributors.

**Panel A**

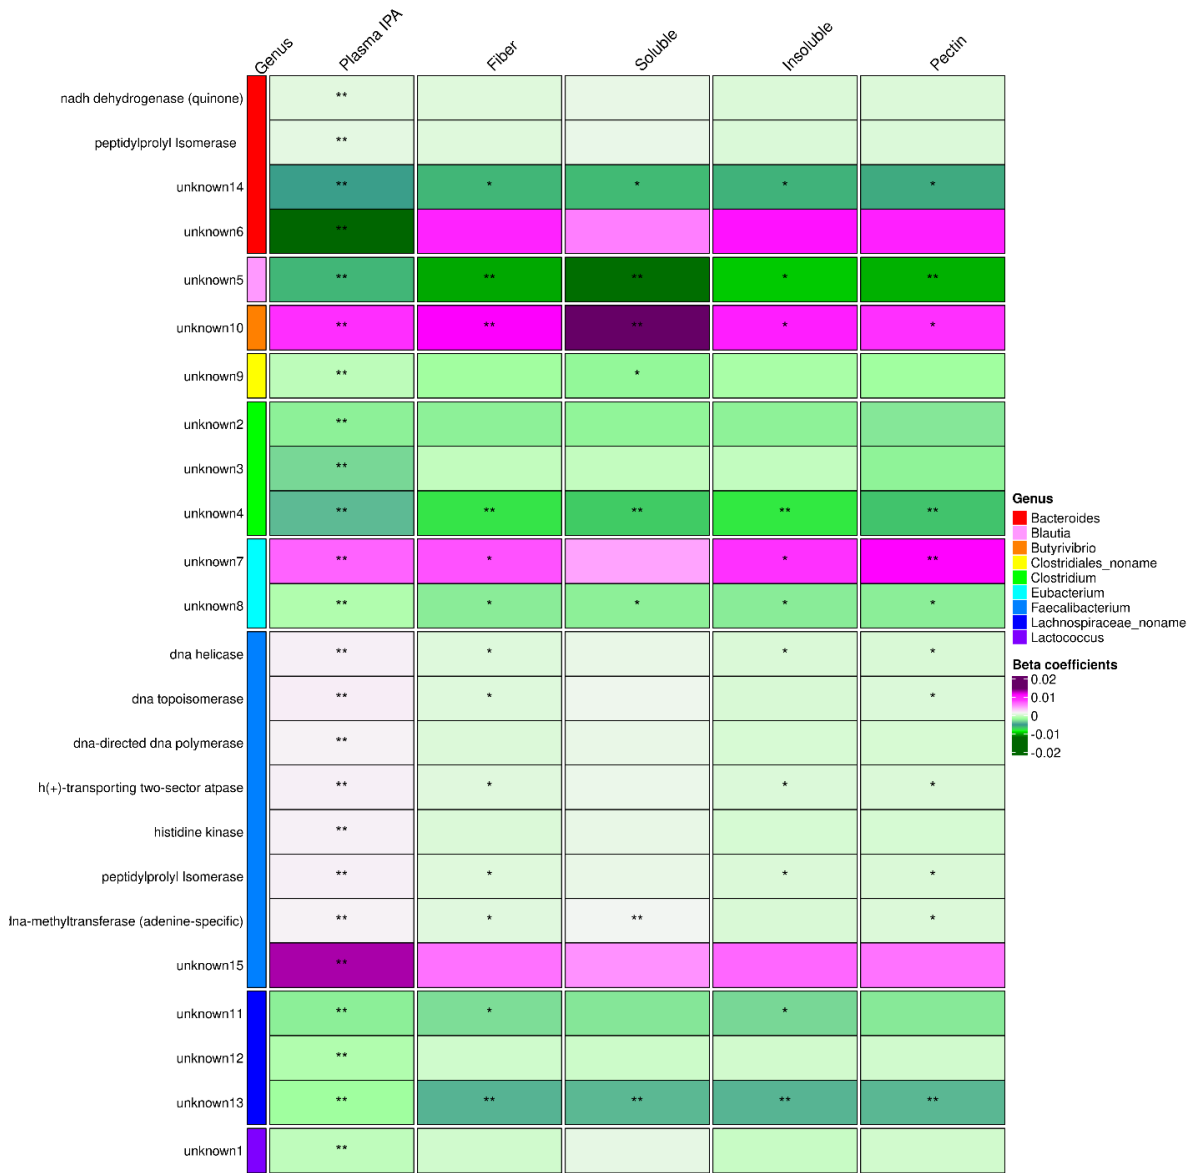

**Panel B**

DNA pathways of IPA-associated species

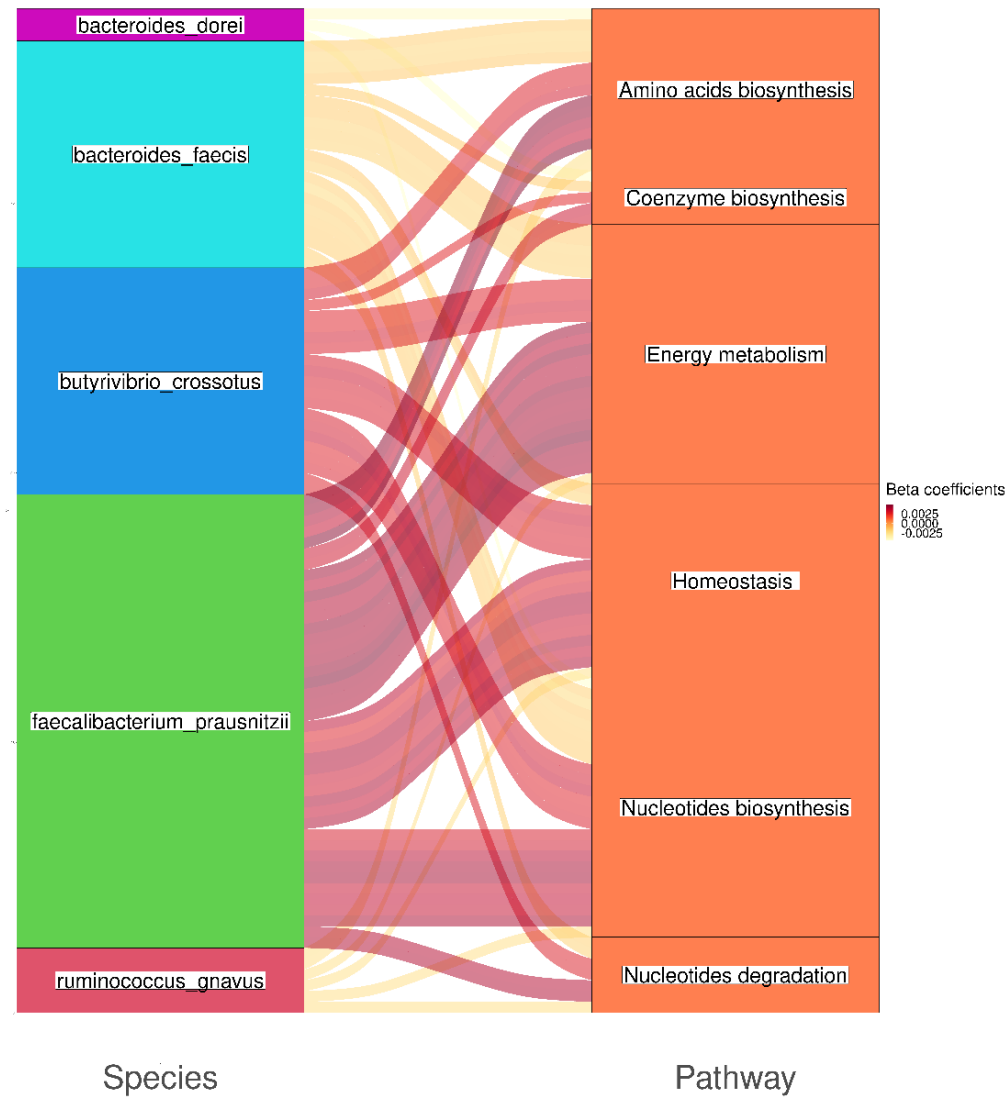

**Supplemental figure 3.** Functional analysis of the associations between relative abundance of DNA enzymes and pathways and identified IPA-associated species. **Panel A** shows the DNA enzymes associated with IPAs and fiber among IPA-related species. Panel B illustrates the DNA pathways associated with the IPA-related species.
